# Supplementary material for: A new firefly genus from South America, with seven new species, a new combination, and notes on the phylogeny of Lampyrinae: Lucidotini (Coleoptera: Lampyridae)
Source: PeerJ journal article supplement (doi:10.7717/peerj.18967), 2025-02-19
Supplement: S4_ModelFinder_output.xlsx [file S4_ModelFinder_output.xlsx]

## Sheet: Sheet1
Supplemental File 4 – Output of model selection in ModelFinder
Best-fit model according to BIC: MK+FQ+ASC+G4
List of models sorted by BIC scores:
Model	LogL	AIC	w-AIC	AICc	w-AICc	BIC	w-BIC
MK+FQ+ASC+G4	-2108.241	4340.48	0.803	4570.25	1	4500.11	0.96
MK+FQ+ASC+R2	-2109.182	4344.36	0.115	4588.73	9.7e-05	4506.57	0.038
MK+FQ+ASC+R3	-2107.527	4345.05	0.0816	4621.83	6.3e-12	4512.41	0.00205
MK+FQ+ASC	-2126.823	4375.65	1.86e-08	4591.76	2.13e-05	4532.7	8.04e-08
AIC, w-AIC : Akaike information criterion scores and weights.
AICc, w-AICc : Corrected AIC scores and weights.
BIC, w-BIC : Bayesian information criterion scores and weights.
